# Supplementary material
Source: PubMed Central journal article supplement (PMC3710798)
Supplement: 1302251110_pnas.201302251SI.pdf [file 1302251110_pnas.201302251SI.pdf]

# Supporting Information

Jenkins et al. 10.1073/pnas.1302251110

**Table S1. Number of species occurring in the single-taxon richness centers and percent of total species**

| Number of species          | Birds (%)      | Mammals (%)   | Amphibians (%) | Total species (%) |
|----------------------------|----------------|---------------|----------------|-------------------|
| 5% of all species          | 4,692 (46.8)   | 1,984 (37.6)  | 2,294 (37.1)   | 8,970 (41.7)      |
| 5% of small-ranged species | 8,012 (79.9)   | 4,366 (82.8)  | 5,975 (96.6)   | 18,353 (85.4)     |
| 5% of threatened species   | 7,219 (72.0)   | 2,806 (53.2)  | 5,332 (86.2)   | 15,357 (71.5)     |
| All richness centers       | 9,040 (90.1)   | 4,566 (86.6)  | 6,102 (98.6)   | 19,708 (91.7)     |
| Myers hotspots             | 8,268 (82.4)   | 3,851 (73.1)  | 4,583 (74.1)   | 16,702 (77.7)     |
| Total in dataset           | 10,033 (100.0) | 5,270 (100.0) | 6,188 (100.0)  | 21,491 (100.0)    |

**Table S2. Area of the single-taxon richness centers and their percentage of the global land area**

| Area in square kilometers  | Birds (%)           | Mammals (%)         | Amphibians (%)      |
|----------------------------|---------------------|---------------------|---------------------|
| 5% of all species          | 6,730,400 (5.0)     | 6,872,000 (5.1)     | 6,825,400 (5.1)     |
| 5% of small-ranged species | 6,780,300 (5.0)     | 8,037,700 (6.0)     | 2,965,900 (2.2)     |
| 5% of threatened species   | 9,037,300 (6.7)     | 9,317,200 (6.9)     | 10,855,500 (8.1)    |
| All richness centers       | 19,198,700 (14.3)   | 19,107,000 (14.2)   | 17,050,900 (12.7)   |
| Myers hotspots             | 16,756,065 (12.5)   | 16,756,065 (12.5)   | 16,756,065 (12.5)   |
| Total land area            | 134,468,064 (100.0) | 134,468,064 (100.0) | 134,468,064 (100.0) |
